# Supplementary material for: Senescence Induces Dysfunctions in Endothelial Progenitor Cells and Osteoblasts by Interfering Translational Machinery and Bioenergetic Homeostasis
Source: MDPI journal article supplement (doi:10.3390/ijms19071997), 2018-07-09
Supplement: s1 [file s1]

**Table S1.** Demographic information of endothelial progenitor cells (EPCs) donors.

| No. of EPC Clones | Gender <sup>#</sup> | Age (Year) | Experiment <sup>*</sup>            |
|-------------------|---------------------|------------|------------------------------------|
| 11B39             | M                   | 20         | Exp1                               |
| 11D30             | M                   | 20         | Exp1, Exp2, Exp3, Exp4, Exp5, Exp6 |
| 11D46             | M                   | 20         | Exp2                               |
| 11D67             | M                   | 25         | Exp3, Exp4, Exp5, Exp6             |
| 11D75             | M                   | 29         | Exp1, Exp2, Exp3, Exp4, Exp5, Exp6 |
| 11E48             | M                   | 25         | Exp2                               |

<sup>#</sup> M = Male. <sup>\*</sup> Each experiment was replicated with at least 3 different clones of EPCs. Experiment 1 (Exp1): Aging of EPCs, shown in Figure 1. Experiment 2 (Exp2): Co-culture of EPCs and murine osteoblast cell line (MC3T3-E1), shown in Figure 2. Experiment 3 (Exp3): Transwell chamber assay, shown in Figure 3. Experiment 4 (Exp4): Cellular signal transduction analysis, shown in Figure 4. Experiment 5 (Exp5): Cellular redox analysis, shown in Figure 5. Experiment 6 (Exp6): Bioenergetics analysis of EPCs, shown in Figure 6.
